# Supplementary material
Source: PubMed Central journal article supplement (PMC4714714)
Supplement: NIHMS750489-supplement-Sup002.pdf [file NIHMS750489-supplement-Sup002.pdf]

**6-Substituted Pyrrolo[2,3-*d*]pyrimidine Thienoyl Regioisomers as Targeted Antifolates for Folate Receptor  $\alpha$  and the Proton-coupled Folate Transporter in Human Tumors**

Lei Wang<sup>f</sup>, Adrienne Wallace<sup>ll</sup>, Sudhir Raghavan<sup>f</sup>, Siobhan M. Deis<sup>¥</sup>, Mike R. Wilson<sup>‡</sup>, Si Yang<sup>f</sup>,  
Lisa Polin<sup>ll‡</sup>, Kathryn White<sup>ll‡</sup>, Juiwanna Kushner<sup>ll‡</sup>, Steven Orr<sup>ll</sup>, Christina George<sup>ll</sup>, Carrie  
O'Connor<sup>ll</sup>, Zhanjun Hou<sup>ll‡</sup>, Shermaine Mitchell-Ryan<sup>‡</sup>, Charles E. Dann III<sup>¥</sup>, Larry H. Matherly<sup>ll</sup>  
<sup>‡§€\*</sup>, and Aleem Gangjee<sup>£€\*</sup>

**SUPPORTING INFORMATION**

**Table 1S. Elemental Analysis**

**Table 2S. High-Resolution Mass Spectra (HRMS) (ESI)**

**Table 3S. Crystallographic data collection and refinement statistics for  
glycinamide ribonucleotide formyltransferase (GARFTase) in complex with  $\beta$ -GAR  
and 5, 7, or pemetrexed (PMX).**

**Table 4S. Molecular contacts of GARFTase with antifolates based on  
crystallographic models.**

**Molecular modeling studies**

**Table 1S. Elemental Analysis**

| Cpd | Formula                                | Calculated, % |      |       |      | Found, % |      |       |      |
|-----|----------------------------------------|---------------|------|-------|------|----------|------|-------|------|
|     |                                        | C             | H    | N     | S    | C        | H    | N     | S    |
| 5   | $C_{19}H_{21}N_5O_6S \cdot 1.7 H_2O$   | 47.73         | 5.14 | 14.65 | 6.71 | 47.75    | 4.95 | 14.38 | 6.59 |
| 7   | $C_{19}H_{21}N_5O_6S \cdot 1.4 H_2O$   | 48.28         | 5.08 | 14.82 | 6.78 | 48.23    | 4.90 | 14.74 | 6.73 |
| 6   | $C_{19}H_{21}N_5O_6S \cdot 1.2 HCO_2H$ | 48.26         | 4.69 | 13.93 | 6.39 | 48.33    | 4.83 | 13.55 | 6.82 |
| 8   | $C_{19}H_{21}N_5O_6S \cdot 0.3 CHCl_3$ | 47.97         | 4.44 | 14.49 | 6.64 | 48.36    | 4.58 | 14.25 | 6.45 |

**Table 2S. High-Resolution Mass Spectra (HRMS) (ESI)**

| Compound | Formula                       | Calculated mass | Found mass |
|----------|-------------------------------|-----------------|------------|
| 6        | $C_{19}H_{21}N_5O_6S (M+H)^+$ | 448.1285        | 448.1280   |

**Table 3S. Crystallographic data collection and refinement statistics for glycinamide ribonucleotide formyltransferase (GARFTase) in complex with  $\beta$ -GAR and 5, 7, or pemetrexed (PMX). Values in parentheses are for the highest resolution shell.**

|                             | <b>GARFTase / Cpd 5</b> | <b>GARFTase / Cpd 7</b> | <b>GARFTase / PMX</b> |
|-----------------------------|-------------------------|-------------------------|-----------------------|
| PDB ID                      | 4ZZ1                    | 4ZZ2                    | 4ZZ3                  |
| <b>Data Collection</b>      |                         |                         |                       |
| Space group                 | P3 <sub>2</sub> 21      | P3 <sub>2</sub> 21      | P3 <sub>2</sub> 21    |
| a=b, c (Å)                  | 75.34, 100.74           | 75.58, 101.00           | 74.98,100.93          |
| Molecule per a.s.u          | 1                       | 1                       | 1                     |
| Resolution                  | 50-1.35 (1.37-1.35)     | 50-1.45 (1.48-1.45)     | 50-2.50 (2.54-2.50)   |
| I/ $\sigma$ I               | 27.8 (2.3)              | 31.3 (1.9)              | 28.2 (3.8)            |
| Completeness (%)            | 98.9 (88.9)             | 99.6 (96.8)             | 99.6 (99.4)           |
| Redundancy                  | 9.7 (3.6)               | 10.3 (4.9)              | 8.0 (4.9)             |
| R <sub>sym</sub>            | 7.0 (43.0)              | 6.6 (52.1)              | 6.7 (35.6)            |
| R <sub>pim</sub>            | 2.3 (23.1)              | 2.1 (24.7)              | 2.5 (17.5)            |
| CC* (high resolution shell) | 0.957                   | 0.951                   | 0.975                 |
| <b>Refinement</b>           |                         |                         |                       |
| Resolution (Å)              | 40-1.35                 | 40-1.45                 | 40-2.50               |
| No. reflections             |                         |                         |                       |
| Used in refinement          | 70157                   | 57888                   | 11574                 |
| Used in Rfree calculation   | 2004                    | 2005                    | 1158                  |
| Rfactor (%)                 | 13.96                   | 14.15                   | 19.55                 |
| Rfree (%)                   | 15.77                   | 16.24                   | 24.33                 |
| No. atoms                   |                         |                         |                       |
| Protein                     | 1608                    | 1580                    | 1489                  |
| Ligand                      | 49                      | 49                      | 49                    |

|                                       |       |       |       |
|---------------------------------------|-------|-------|-------|
| Water molecules                       | 328   | 300   | 27    |
| B-factors ( $\text{\AA}^2$ , average) |       |       |       |
| Overall                               | 23.4  | 22.8  | 49.4  |
| Ligand                                | 21.5  | 21.1  | 62.0  |
| Water molecules                       | 37.9  | 37.7  | 35.6  |
| r.m.s. deviations                     |       |       |       |
| Bond lengths ( $\text{\AA}$ )         | 0.006 | 0.006 | 0.002 |
| Bond angles ( $^\circ$ )              | 1.163 | 1.144 | 0.695 |
| MolProbity clash score                | 0.90  | 0.61  | 3.90  |

**Table 4S. Molecular contacts of GARFTase with antifolates based on crystallographic models.** The interacting atoms and the contact distances between heavy atoms are shown with the distances greater than 3.2 Å in red. Atom labels are in accordance with those in the PDB coordinate files.

| GARFTase / Cpd 5     |                      |           | GARFTase / Cpd 7     |                      |           | GARFTase / PMX |         |           |
|----------------------|----------------------|-----------|----------------------|----------------------|-----------|----------------|---------|-----------|
| Atom 1               | Atom 2               | Dist. (Å) | Atom 1               | Atom 2               | Dist. (Å) | Atom 1         | Atom 2  | Dist. (Å) |
| Asp 951 N            | Cpd 5 O10            | 3.1       | Asp 951 N            | Cpd 7 O10            | 3.0       | Ala 947 O      | PMX N16 | 3.1       |
| Ala 947 O            | Cpd 5 N3             | 2.8       | Ala 947 O            | Cpd 7 N3             | 2.8       | Glu 948 O      | PMX N19 | 3.1       |
| Glu 948 O            | Cpd 5 N11            | 3.0       | Glu 948 O            | Cpd 7 N11            | 3.0       | Leu 899 N      | PMX N18 | 3         |
| Leu 899 O            | Cpd 5 N11            | 3.1       | Leu 899 O            | Cpd 7 N11            | 3.1       | Arg 897 O      | PMX N11 | 2.7       |
| Leu 899 N            | Cpd 5 N1             | 3.0       | Leu 899 N            | Cpd 7 N1             | 3.0       | Met 896 O      | PMX N22 | 2.8       |
| Arg 897 O            | Cpd 5 N5             | 2.9       | Arg 897 O            | Cpd 7 N5             | 2.9       | Arg 897 NH1    | PMX O30 | 4.2       |
| Met 896 O            | Cpd 5 N19            | 2.8       | Met 896 O            | Cpd 7 N19            | 2.9       | Arg 897 NH1    | PMX O31 | 3.8       |
| Ile 898 N            | Cpd 5 O28            | 2.9       | Ile 898 N            | Cpd 7 O28            | 2.9       | Arg 897 NH2    | PMX O31 | 2.5       |
| Arg 871 NH1          | Cpd 5 O28            | 2.8       | Arg 871 NH1          | Cpd 7 O28            | 2.8       |                |         |           |
| Arg 871 NH2          | Cpd 5 O27            | 2.6       | Arg 871 NH2          | Cpd 7 O27            | 2.6       |                |         |           |
| Arg 897 NH2          | Cpd 5 O27            | 3.7       | Arg 897 NH2          | Cpd 7 O27            | 3.7       |                |         |           |
| H <sub>2</sub> O 110 | Cpd 5 O25            | 2.3       | H <sub>2</sub> O 300 | Cpd 7 O24            | 2.6       |                |         |           |
| Arg 897 NH1          | H <sub>2</sub> O 110 | 2.8       | Arg 897 NH1          | H <sub>2</sub> O 300 | 2.8       |                |         |           |
| Lys 844 NZ           | Cpd 5 O25            | 4.7       | Lys 844 NZ           | Cpd 7 O25            | 5.0       |                |         |           |

**Molecular modeling studies.** The X-ray crystal structures of human folate receptor (FR) FR $\beta$  (PDB: 4KN0, 2.10 Å resolution)<sup>1</sup> and human glycinamide ribonucleotide formyltransferase (GARFTase) (PDB: 1NJS, 1.98 Å resolution)<sup>2</sup> are known. We docked our proposed 6-substituted pyrrolo[2,3-*d*]pyrimidine analogs **5** and **7** into the known structures for FR $\beta$  and GARFTase using the software LeadIT 2.1.6<sup>3</sup> and previously described methods<sup>4</sup> to predict activities of the analogs for uptake by FRs and for GARFTase inhibition.

## FR $\beta$

FR $\alpha$  and FR $\beta$  share high sequence identity (82%) and sequence similarity (92%).<sup>1</sup> **Figure 4** in the manuscript shows the superimposition of the docked poses of **5** (red) and **7** (green) in the human FR $\alpha$  (PDB ID: 4LRH)<sup>5</sup> active site. The docked conformations of **5** and **7** in the X-ray crystal structure of FR $\beta$  bound to PMX (PDB: 4KN0; **Figure 1S**)<sup>1</sup> were very similar to those seen in the docking studies with FR $\alpha$ .

**Figure 1S** shows the superimposition of the docked poses of **5** (green) and **7** (red) in the human FR $\beta$  (PDB ID: 4KN0)<sup>1</sup> active site. The original crystal structure ligand, methotrexate (MTX), is not shown. The N1 nitrogens of **5** and **7** can interact with Arg119 while the 2-NH<sub>2</sub> moieties of both compounds interact via water molecules with Phe123. The pyrrolo[2,3-*d*]pyrimidine scaffolds can form hydrophobic interactions with Tyr76, Tyr101 and Trp187, similar to that seen with the bicyclic scaffold of MTX in the crystal structure. The thiophene rings of the two compounds can interact with Phe78, Trp118 and Trp156, analogous to the benzoyl moiety of MTX. The *L*-glutamate moieties of both compounds are similarly oriented and thus mimic the corresponding glutamate in MTX. The  $\alpha$ -carboxylic acid of the glutamate side chain can form hydrogen bonds with the backbone NH of Gly153, Trp154 and Trp156. The  $\gamma$ -carboxylic acid can interact with the side chain NH group of Trp118. The docking scores of **5** and **7** were -47.40 kJ/mol and -42.44 kJ/mol, compared with -48.67 kJ/mol for folic acid.

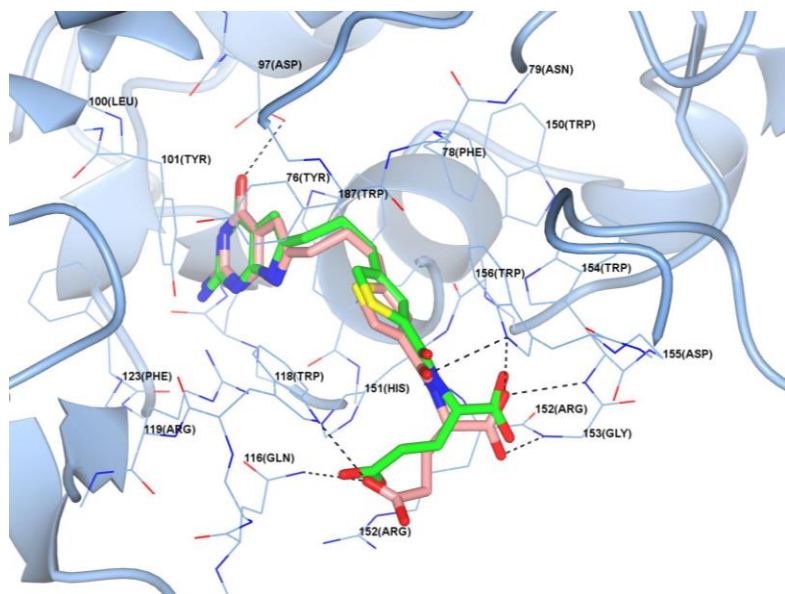

**Figure 1S. Molecular modeling of 5 and 7 with FR $\beta$ .** Superimposition of the docked poses of **5** (green) and **7** (pink) in the folate site of human FR $\alpha$  (PDB: 4KN0).

### GARFTase

Docking studies were carried out using the X-ray crystal structure of human GARFTase bound to trifluoroacetyl-5,10-dideaza-acyclic-5,6,7,8-tetrahydrofolic acid (10-CF<sub>3</sub>CO-DDACTHF, PDB: 1NJS).<sup>2</sup> **Figure 3S** shows the superimposition of the docked poses of **5** (green) and **7** (pink) in the GARFTase active site. As was seen with the docked conformations of these compounds in FR $\alpha$ , the docked conformations of both compounds are very similar. The 2-NH<sub>2</sub> and N1 moieties of **5** and **7** form hydrogen bonds with the backbone carbonyl and NH of Leu92, respectively. Additional hydrogen bonds are formed between 2-NH<sub>2</sub> of the two compounds with the backbone carbonyl of Asp142, 3-NH with the backbone of Ala140, and between the 4-oxo and backbone NH of Asp144. The pyrrolo[2,3-*d*]pyrimidine scaffolds of **5** and **7** bind in the region occupied by the diaminopyrimidine ring in 10-CF<sub>3</sub>CO-DDACTHF (not shown) and form hydrophobic interactions with Leu85, Leu92, Val139. The pyrrole N7-nitrogens of the two compounds form hydrogen bonds with the backbone NH of Arg90. The pyrrolo[2,3-*d*]pyrimidine scaffolds of the two compounds form hydrophobic interactions with Leu85, Ile91, Ile91, Leu92, Val97 and

Val143. Subtle differences in the docked conformations of **5** and **7** occur in the thienoyl moieties, resulting from interaction of the thienoyl carbonyl of **5**, forming a hydrogen bond with the side chain of Ser116, and the corresponding carbonyl of **7** predicted to form a hydrogen bond with the backbone NH of Ile91. The glutamate chains of **5** and **7** are oriented similarly with the  $\gamma$ -COOH interacting with the side chain of Arg90 and the backbone NH of Leu91 and the  $\alpha$ -COOH solvent exposed. The docking scores of **5** and **7** were -50.49 kJ/mol and -57.77 kJ/mol, respectively, compared with -53.90 kJ/mol for the crystal structure ligand 10-CF<sub>3</sub>CO-DDACTHF. Molecular docking studies, described above, provided additional support for the synthesis and biological evaluation of **5** and **7** as FR-transportable analogs and as potent GARFTase inhibitors.

A comparison of the docked pose of **7** and its X-ray crystal structure pose in the 10-formyl tetrahydrofolate binding site of human GARFTase is shown in **Figure 6S**.



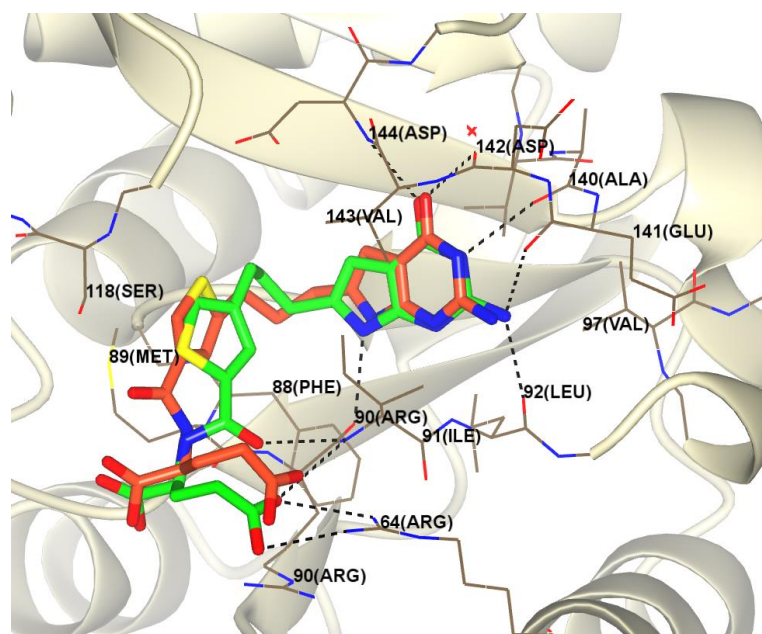

**Figure 2S. Molecular modeling of 5 and 7 with human GARFTase.** Superimposition of the docked poses of 5 (green) and 7 (red) in the folate site of human GARFTase (PDB: 1NJS).<sup>2</sup>

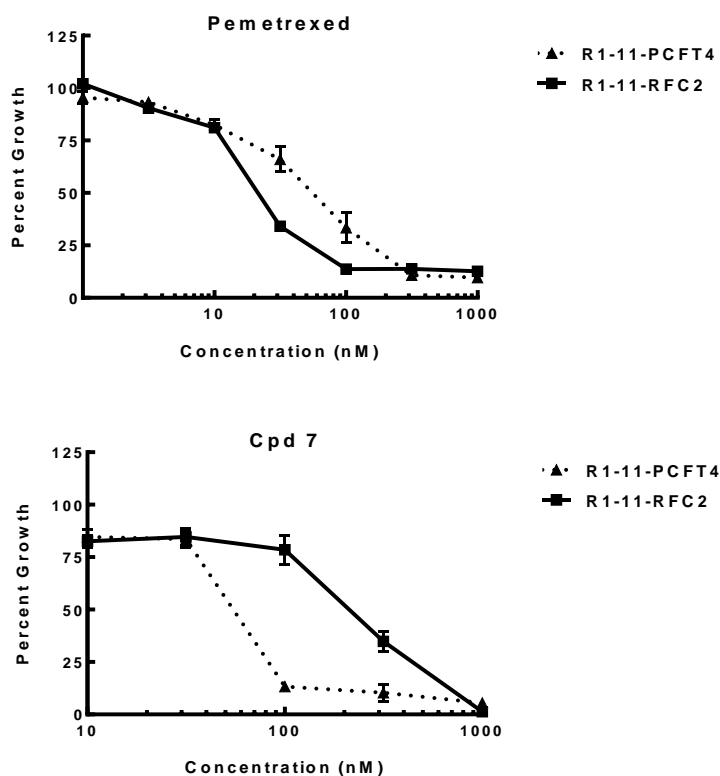

**Figure 3S. Inhibition of R1-11-PCFT4 and R1-11-RFC2 cells by PMX and 7.** Growth inhibition curves for folate-depleted R1-11-PCFT4 and -RFC2 cells treated with pemetrexed or 7 for 96 h are shown. Calculated  $IC_{50}$  values for R1-11-PCFT4 were 59 nM and 56 nM with pemetrexed and 7, respectively.  $IC_{50}$  values for R1-11-RFC2 were 21 nM and 220 nM with pemetrexed and 7, respectively. Abbreviation: Cpd, Compound.

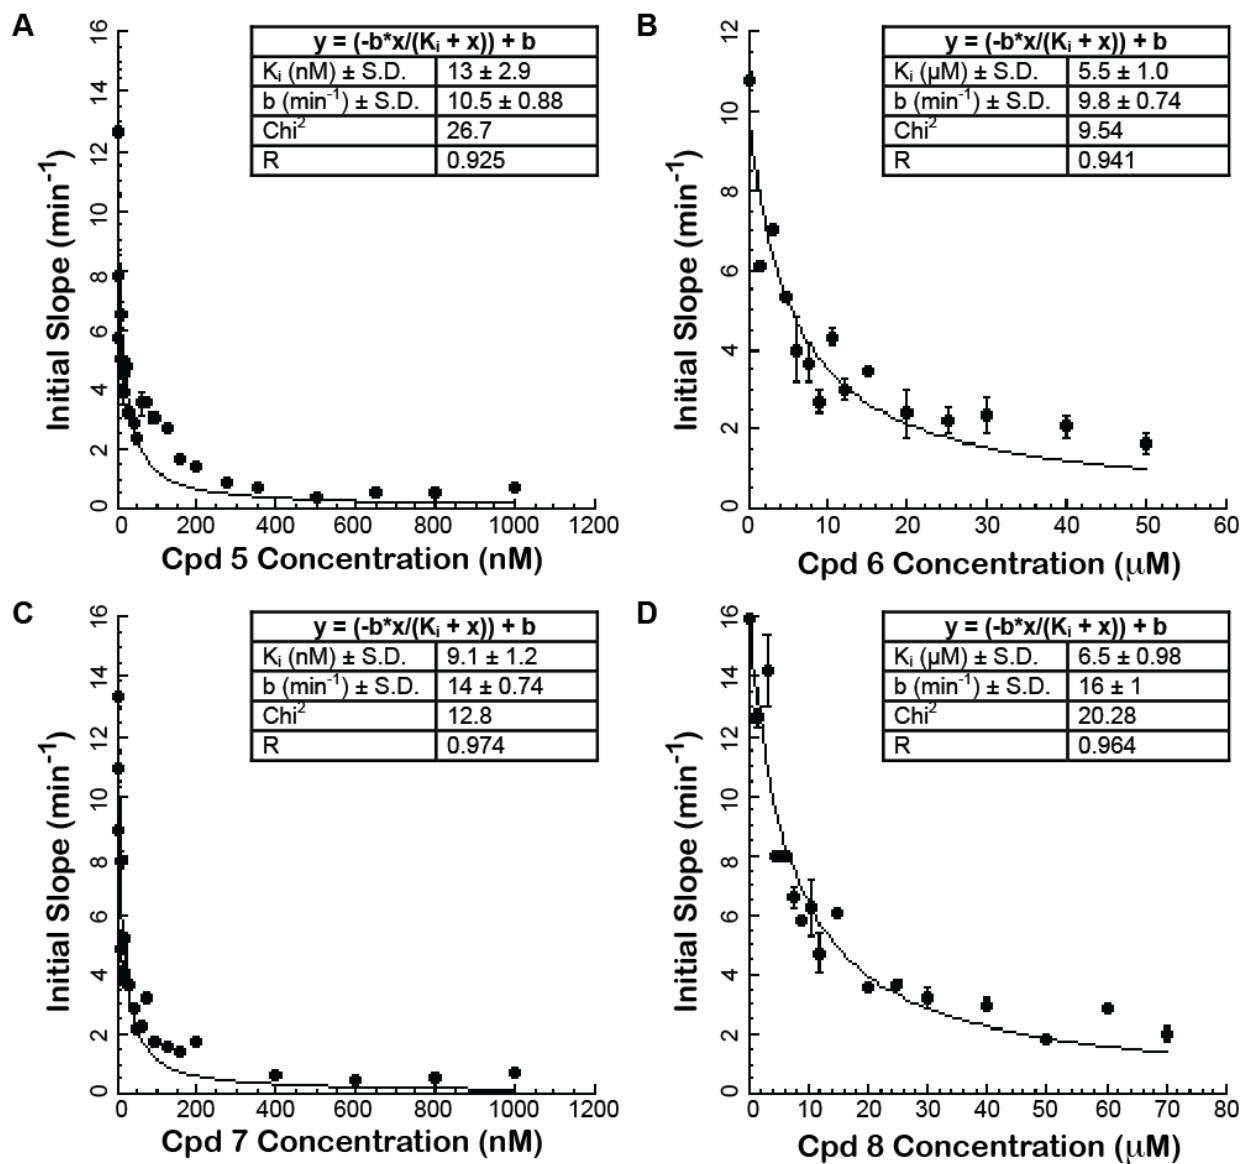

**Figure 4S. (A-D) Graphs of antifolate concentration against initial slope of GARFTase for 5-8.** Each graph was fit to a hyperbola to determine  $K_i$ . The hyperbola equation, determined  $K_i$  and y-intercept ( $b$ ) values, as well as the  $\text{Chi}^2$  and R-value for each curve is listed in the inset table.

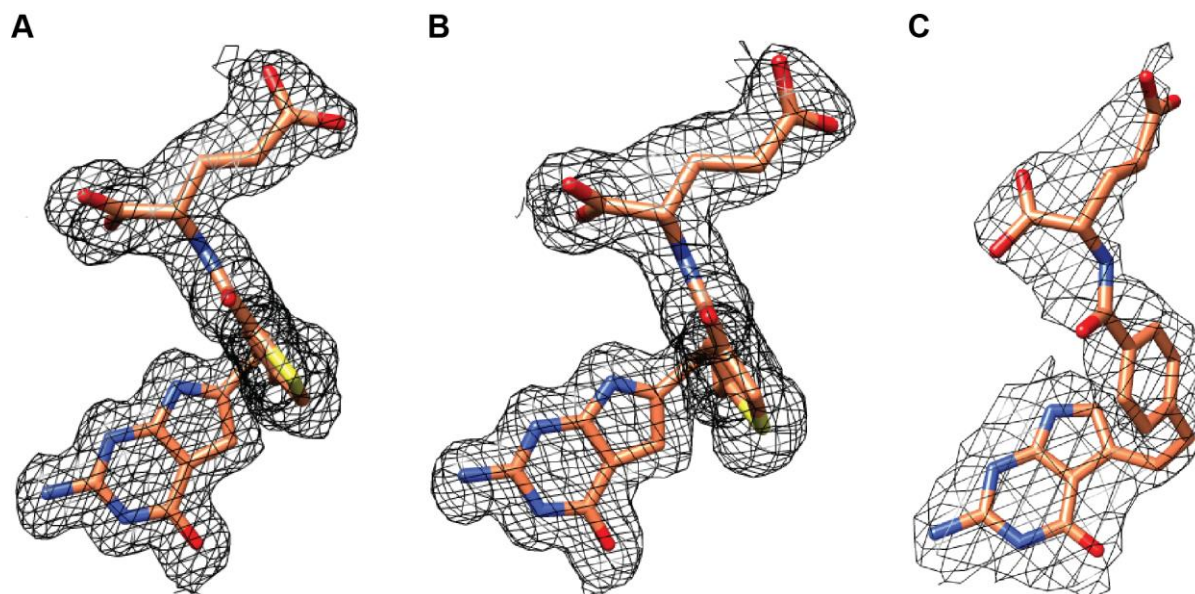

**Figure 5S. Ligand structure and electron density.** (A-C) The structures of **5**, **7**, and **PMX**, respectively, bound to GARFTase with the protein hidden and  $2F_o - F_c$  map density contoured at  $0.7 \sigma$  in mesh.

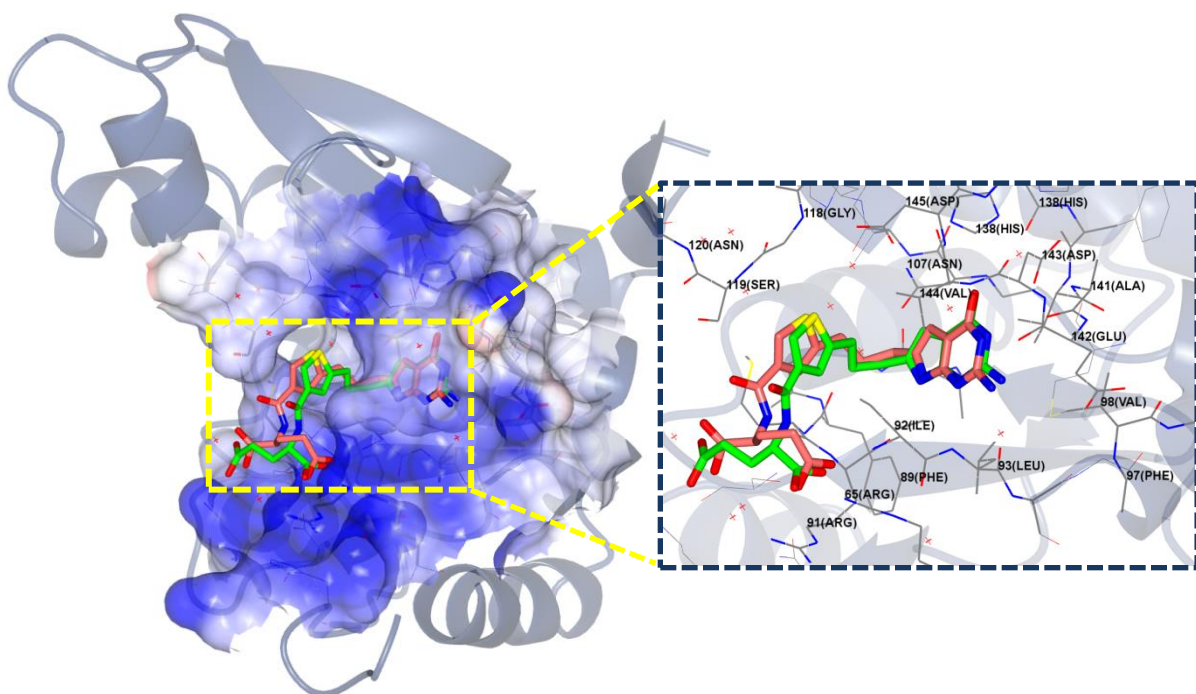

**Figure 6S.** Comparison of the docked pose of **7** (pink) and its X-ray crystal structure pose (green) in the 10-formyl tetrahydrofolate binding site of human GARFTase.

## References

1. Wibowo, A. S.; Singh, M.; Reeder, K. M.; Carter, J. J.; Kovach, A. R.; Meng, W.; Ratnam, M.; Zhang, F.; Dann, C. E., 3rd, Structures of human folate receptors reveal biological trafficking states and diversity in folate and antifolate recognition. *Proceedings of the National Academy of Sciences of the United States of America* **2013**, *110*, 15180-8.
2. Zhang, Y.; Desharnais, J.; Marsilje, T. H.; Li, C.; Hedrick, M. P.; Gooljarsingh, L. T.; Tavassoli, A.; Benkovic, S. J.; Olson, A. J.; Boger, D. L.; Wilson, I. A., Rational design, synthesis, evaluation, and crystal structure of a potent inhibitor of human GARTfase: 10-(trifluoroacetyl)-5,10-dideazaacyclic-5,6,7,8-tetrahydrofolic acid. *Biochemistry* **2003**, *42*, 6043-56.
3. LeadIT 2.1.6, B. G. w. b. d. S. A., Germany, 201.

4. Golani, L. K.; George, C.; Zhao, S.; Raghavan, S.; Orr, S.; Wallace, A.; Wilson, M. R.; Hou, Z.; Matherly, L. H.; Gangjee, A., Structure-Activity Profiles of Novel 6-Substituted Pyrrolo[2,3-d]pyrimidine Thienoyl Antifolates with Modified Amino Acids for Cellular Uptake by Folate Receptors alpha and beta and the Proton-Coupled Folate Transporter. *J Med Chem* **2014**, *57*, 8152-66.
5. Chen, C.; Ke, J.; Zhou, X. E.; Yi, W.; Brunzelle, J. S.; Li, J.; Yong, E. L.; Xu, H. E.; Melcher, K., Structural basis for molecular recognition of folic acid by folate receptors. *Nature* **2013**, *500*, 486-9.
